# Supplementary material for: Silk derived formulations for accelerated wound healing in diabetic mice
Source: PeerJ. 2021 Jan 8;9:e10232. doi: 10.7717/peerj.10232 (PMC7798629; doi:10.7717/peerj.10232)
Supplement: Supplemental Information 1 [file peerj-09-10232-s001.xlsx]

## Sheet: Sheet1
							Percent wound contraction in all groups
								sericin and aloe vera gel
					Day	Mouse 1 (M1)	M2	M3	M4	M5	M6	mean	stdev	st error	mean +sr error
					1	0	0	0	0	0	0	0	0	0	0
			group 1		3	25	17	17	17	13	33	20.3333	7.33939	2.99629	20.33±2.996
					5	42	50	46	46	25	50	43.1667	9.38971	3.83333	43.16 ±3.83
					7	50	58	50	54	42	50	50.6667	5.31664	2.17051	50.667±2.17
					9	67	67	68	63	54	54	62.1667	6.5549	2.67603	62.16 ±2.67
					11	75	75	78	63	63	67	70.1667	6.6458	2.71314	70.166±2.71
					13	80	77	79	71	67	79	75.5	5.28205	2.15639	75.5±2.15
					15	88	92	91	88	83	83	87.5	3.83406	1.56525	87.5±1.56
					17	100	99	99	100	100	99	99.5	0.547723	0.223607	100±0.22
								sericin
					Day	M1	M2	M3	M4	M5	M6	mean	stdev	st error	mean± st error
			group 2		1	0	0	0	0	0	0	0	0	0	0±0
					3	0	8	23	8	25	20	14	10.0598	4.1069	14±4.10
					5	39	25	31	25	25	30	29.1667	5.52871	2.25709	29.16±2.25
					7	46	50	54	45	42	42	46.5	4.72229	1.92787	46.5±1.92
					9	58	50	65	50	58	55	56	5.6921	2.32379	56±2.32
					11	62	58	66	63	58	65	62	3.40588	1.39044	62±1.39
					13	72	60	69	71	83	75	71.6667	7.52773	3.07318	71.66 ±3.07
					15	92	88	89	80	90	85	87.3333	4.27395	1.74483	87.33± 1.74
					17	100	95	99	99	98	100	98.5	1.87083	0.763763	98.5±0.76
								fibroin
					Day	M1	M2	M3	M4	M5	M6	mean	stdev	st error	mean ±st error
			group 3		1	0	0	0	0	0	0	0	0	0	0±0
					3	25	33	38	25	17	30	28	7.3212	2.98887	28±2.98
					5	54	33	42	42	38	52	43.5	8.09321	3.30404	43.5±3.30
					7	63	63	50	63	46	65	58.3333	8.14043	3.32332	58.3333±3.32
					9	67	67	71	63	50	70	64.6667	7.71146	3.14819	64.666±3.14
					11	79	75	75	71	58	79	72.8333	7.85918	3.2085	72.833±3.20
					13	95	92	93	90	79	89	89.6667	5.64506	2.30458	89.666±2.30
					15	100	99	100	99	100	98	99.3333	0.816497	0.333333	99.3±0.331
								fibroin and aloe vera gel
					Day	M1	M2	M3	M4	M5	M6	mean	st dev	st error	mean ±st error
					1	0	0	0	0	0	0	0	0	0	0±0
			group4		3	21	15	23	17	23	20	19.8333	3.25064	1.32707	19.83±1.32
					5	33	31	54	50	35	55	43	11.1535	4.55339	43±4.55
					7	58	42	65	58	54	58	55.8333	7.65289	3.12428	55.833±3.12
					9	67	58	73	75	73	72	69.6667	6.31401	2.57768	69.66±2.57
					11	83	83	85	90	89	88	86.3333	3.07679	1.2561	86.333±1.25
					13	100	99	99	95	100	97	98.3333	1.96638	0.802773	98.33±0.80
					15
								saline
					Day	M1	M2	M3	M4	M5	M6	mean	st dev	st error	mean ± st error
					1	0	0	0	0	0	0	0	0	0	0 ± 0
					3	25	33	25	21	17	16	22.8333	6.27429	2.56147	22.833±2.56
			group 5		5	33	33	33	42	33	30	34	4.09878	1.67332	34±1.67
					7	33	33	33	50	46	35	38.3333	7.63326	3.11627	38.333±3.11
					9	33	33	50	54	50	50	45	9.42338	3.84708	45±3.84
					11	50	51	50	63	54	55	53.8333	4.95648	2.02347	53.833±2.02
					13	54	51	50	66	58	60	56.5	6.05805	2.47319	56.5±2.47
					15	58	58	63	66	66	63	62.3333	3.61478	1.47573	62.333±1.47
					17	63	66	69	66	66	63	65.5	2.25832	0.921954	65.5±0.92
					19	70	66	78	66	75	66	70.1667	5.23132	2.13568	70.1667±2.13
					21	85	79	85	83	87	79	83	3.34664	1.36626	83±1.36
					23	90	85	93	90	94	84	89.3333	4.08248	1.66667	89.33±1.66
					25	99	95	99	99	100	97	98.1667	1.83485	0.749074	98.16±0.74
								polyfax
					Day	M1	M2	M3	M4	M5	M6	mean	stdev	st error	mean ± st error
					1	0	0	0	0	0	0	0	0	0	0±0
					3	14.2	17	17	17	17	15	16.2	1.26491	0.516398	16.2±0.51
					5	36	42	33	42	25	30	34.6667	6.7429	2.75278	34.6666666666667±2.75
			group 6		7	50	42	50	50	42	45	46.5	3.98748	1.62788	46.5±1.62
					9	57	42	50	54	58	50	51.8333	5.87934	2.40023	51.83±2.40
					11	64.2	58	64.2	62	63	62	62.2333	2.29579	0.937254	62.2333333333333±0.93
					13	72	75	67	70	67	70	70.1667	3.0605	1.24944	70.16±1.24
					15	86	82	67	87	71	86	79.8333	8.65833	3.53475	79.8333333333333±3.53
					17	92	96	89	97	87	94	92.5	3.937	1.60728	93±1.60
					19	99	100	97	99	96	100	98.5	1.64317	0.67082	98.5±0.67
							Days	5% Sericin gel	5% Sericin + A	5% Fibroin gel	5% fibroin A	polyfax	saline
							3	14±4.10	20.33±2.996	28±2.98	19.83±1.32	16.2±0.51	22.833±2.56
							5	29.167±2.25	43.16 ±3.833	43.5±3.30	43±4.55	34.6667±2.75	34±1.67
							7	46.5±1.92	50.667±2.17	58.3333±3.32	55.833±3.12	46.5±1.62	38.333±3.11
							9	56±2.32	62.1667±2.67	64.666±3.14	69.66±2.57	51.83±2.40	45±3.84
							11	62±1.39	70.166±2.71	72.833±3.20	86.333±1.25	62.3333±0.93	53.833±2.02
							13	71.667±3.07	75.5±2.15	89.666±2.30	98.33±0.80	70.16±1.24	56.5±2.47
							15	87.3333± 1.74	87.5±1.56	99.3±0.331		79.83333±3.53	62.333±1.47
							17	98.5±0.76	100±0.22			93±1.60	65.5±0.92
							19					98.5±0.67	70.1667±2.13
							21						83±1.36
							23						89.33±1.66
							25						98.16±0.74
