# Supplementary material for: Silk derived formulations for accelerated wound healing in diabetic mice
Source: PeerJ journal article supplement (doi:10.7717/peerj.10232), 2021-01-08
Supplement: Supplementary_Figure_1.pdf [file Supplementary_Figure_1.pdf]

A.

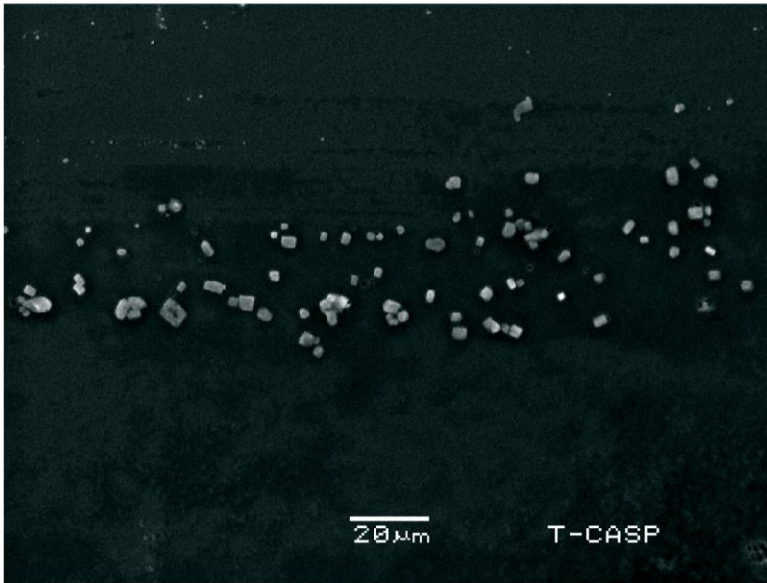

B.

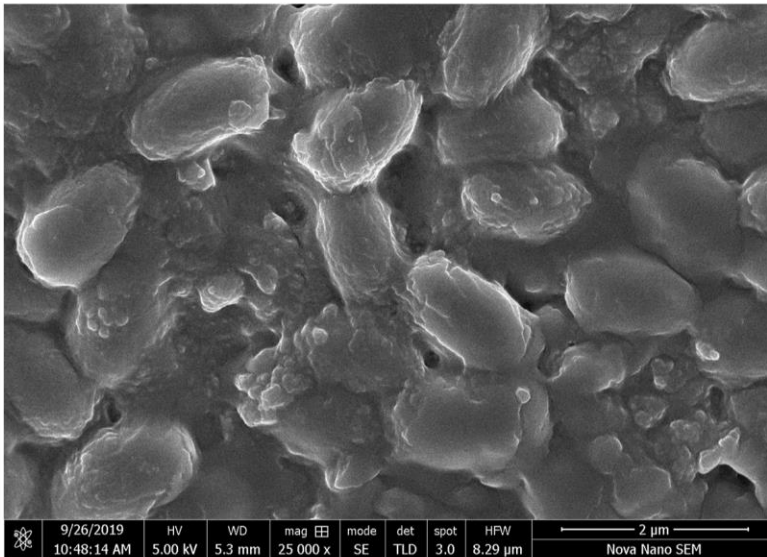

**Supplemental Figure 01. Electron micrographs of Silk fibroin & Silk sericin. A.** Electron micrograph of sonicated silk fibroin. **B.** Silk sericin micrograph.
